# Supplementary material for: CyTOF Profiling of Zika and Dengue Virus-Infected Human Peripheral Blood Mononuclear Cells Identifies Phenotypic Signatures of Monotype Subsets and Upregulation of the Interferon-Inducible Protein CD169
Source: PubMed Central journal article supplement (PMC8265667; doi:10.1128/msphere.00505-21), 2021-06-23
Supplement: msphere.00505-21-sf001.pdf [file msphere.00505-21-sf001.pdf]

## Dendritic cells

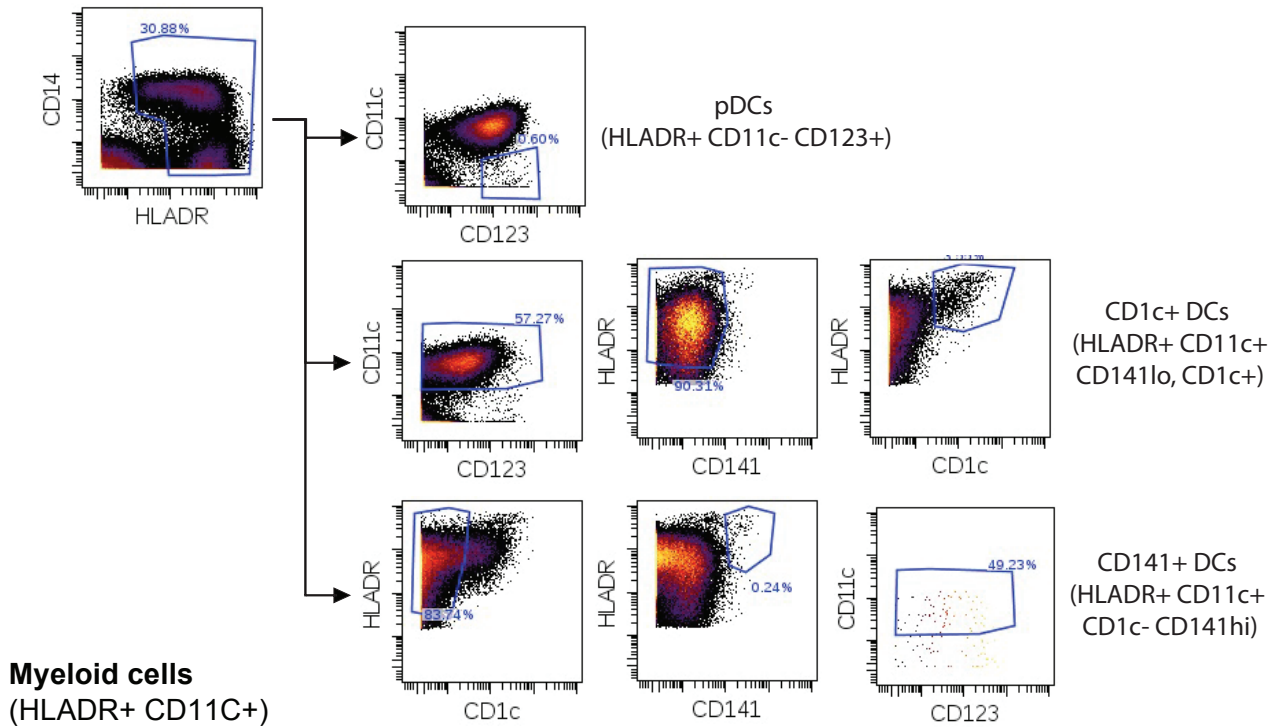

## Myeloid cells (HLADR+ CD11c+)

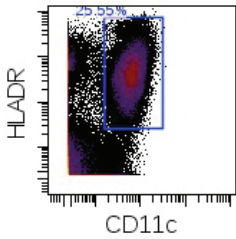

## Monocytes

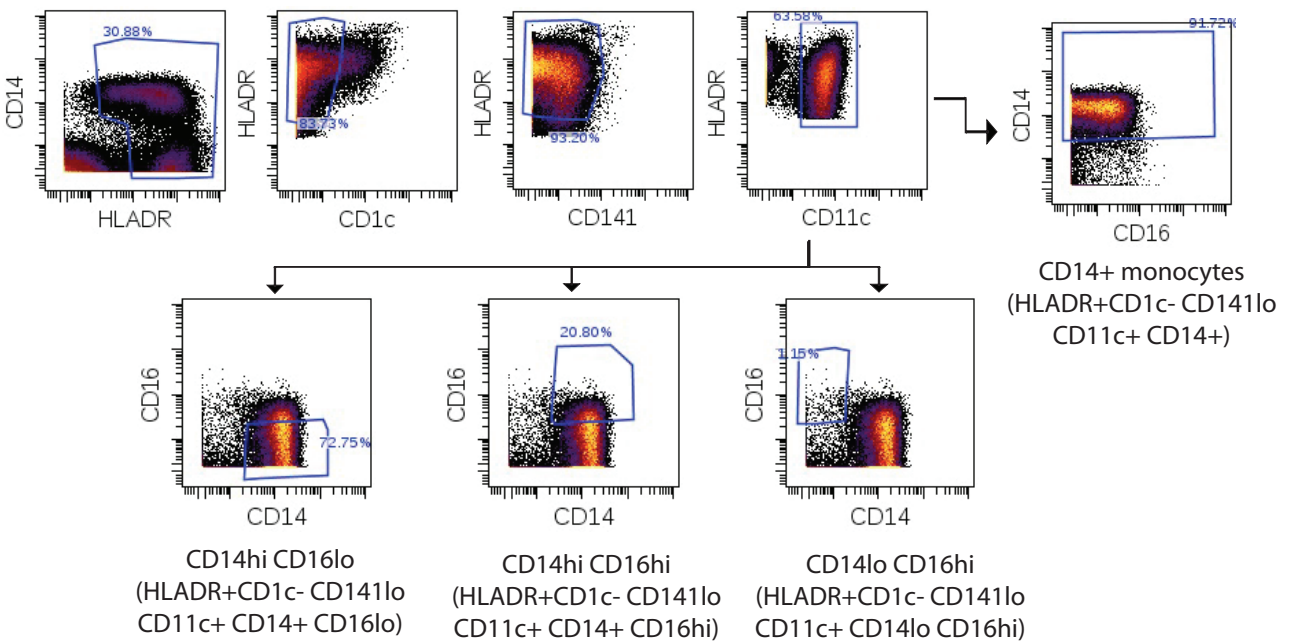

Supplementary Figure 1. Gating strategy for dendritic cells, myeloid cells, monocytes
