# Supplementary material for: CyTOF Profiling of Zika and Dengue Virus-Infected Human Peripheral Blood Mononuclear Cells Identifies Phenotypic Signatures of Monotype Subsets and Upregulation of the Interferon-Inducible Protein CD169
Source: PubMed Central journal article supplement (PMC8265667; doi:10.1128/msphere.00505-21), 2021-06-23

## T cells

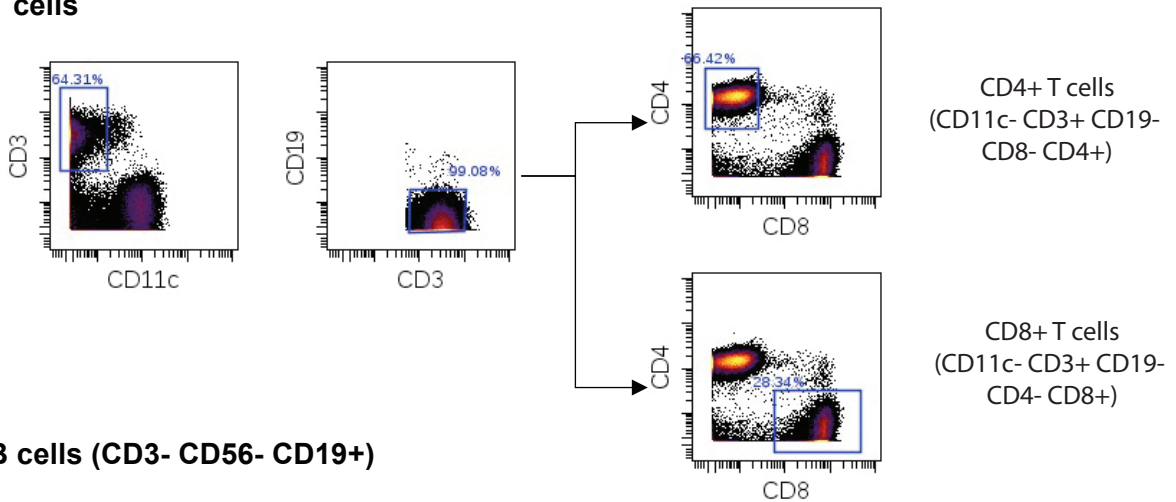

## B cells (CD3- CD56- CD19+)

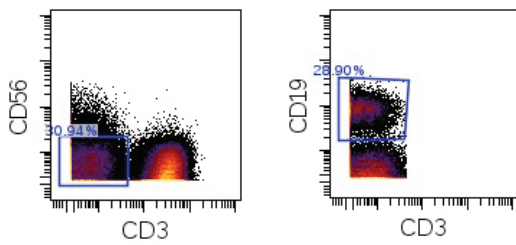

## NK cells (CD3- CD19- CD56+)

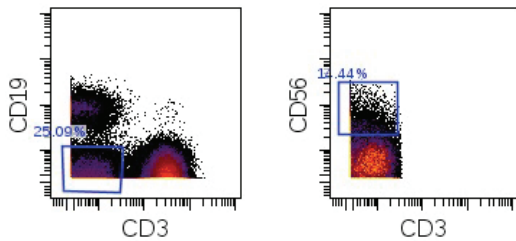

Supplement: msphere.00505-21-sf002.pdf [file msphere.00505-21-sf002.pdf]
